1 **Antiviral activity of molnupiravir precursor NHC against Variants of Concern (VOCs) and its**  
2 **therapeutic window in a human lung cell model**

3

4 **Keywords:** Molnupiravir, NHC, Anti-viral,  $\beta$ -D-N4-hydroxycytidine

5

6 **Running title:** *In-vitro* activity of molnupiravir against SARS-CoV-2 Variants of Concern

7

8 Tessa Prince<sup>1,2</sup>, l'ah Donovan-Banfield<sup>1,2</sup>, Hannah Goldswain<sup>1</sup>, Rebekah Penrice-Randal<sup>1</sup>,

9 Lance Turtle<sup>1,2,3</sup>, Tom Fletcher<sup>2,4</sup>, Saye Khoo<sup>2,5</sup>, Julian A. Hiscox<sup>1,2,6\*</sup>

10

11 <sup>1</sup>Institute of Infection, Veterinary and Ecological Sciences, University of Liverpool, UK.

12 <sup>2</sup>NIHR Health Protection Research Unit in Emerging and Zoonotic Infections, Liverpool, UK.

13 <sup>3</sup>Tropical and infectious Disease Unit, Liverpool University Hospitals NHS Foundation Trust.

14 <sup>4</sup>Liverpool School of Tropical Medicine, Liverpool, UK.

15 <sup>5</sup>Department of Pharmacology, University of Liverpool, Liverpool, UK.

16 <sup>6</sup>A\*STAR Infectious Diseases Laboratories (A\*STAR ID Labs), Agency for Science, Technology

17 and Research (A\*STAR), Singapore.

18

19 \*Corresponding author: [julian.hiscox@liverpool.ac.uk](mailto:julian.hiscox@liverpool.ac.uk) Tel: +44 (0)151 795 0222

20

21

22 **Abstract**

23

24 **Background:** The UK Medicines and Regulatory Healthcare Agency (MHRA) have recently  
25 licensed the anti-viral drug, molnupiravir, for use in patients with mild-moderate COVID-19  
26 disease with one or more risk factors for serious illness. Treatment with anti-viral drugs is best  
27 initiated early to prevent progression to severe disease, although the therapeutic window for  
28 intervention has not yet been fully defined. **Objectives:** This study aimed to determine the  
29 activity of the molnupiravir parent drug (NHC) to different SARS-CoV-2 Variants of Concern  
30 (VoCs), and to establish the therapeutic window in human lung cell model. **Methods:** Dose  
31 response assays were performed in parallel to determine the IC50 (the concentration of drug  
32 required to inhibit virus titre by 50%) of NHC against different variants. Human ACE-2 A549  
33 cells were treated with NHC at different time points either before, during or after infection  
34 with SARS-CoV-2. **Results:** Here we demonstrate that  $\beta$ -D-N4-hydroxycytidine (NHC), the  
35 active metabolite of molnupiravir, has equivalent activity against four variants of SARS-CoV-2  
36 in a human lung cell line ranging 0.04-0.16 $\mu$ M IC50. Furthermore, we demonstrate that  
37 activity of the drug begins to drop after 48 hours post-infection. **Conclusions:** One of the main  
38 advantages of molnupiravir is that it can be administered orally, and thus given to patients in  
39 an out-patient setting. These results support giving the drug early on after diagnosis or even  
40 in prophylaxis for individuals with high risk of developing severe disease.

## 41 **Introduction**

42 SARS-CoV-2 emerged in China in late 2019 and has now caused more than 5 million deaths  
43 across the world (Ritchie et al., 2021). In common with other coronaviruses, SARS-CoV-2  
44 genomic variants are generated randomly through both single nucleotide polymorphisms and  
45 recombination resulting in insertions and deletions. These changes can then be subject to  
46 selection pressure in the host, including immune status and application of medical  
47 countermeasures. To date, several Variants of Concern (VOCs) have emerged with apparently  
48 increased transmissibility and reduced susceptibility to anti-viral antibodies. These VOCs  
49 include the Alpha variant (B.1.17), the Beta variant (B.1.351) and the Delta variant (B.1.617.2).  
50 Most recently, the Delta variant has predominated in the UK, and in much of the rest of the  
51 world.

52 While vaccination efforts have been largely successful in preventing severe disease, many  
53 people worldwide remain either unable or unwilling to be vaccinated. However, vaccination  
54 does not prevent household transmission (Singanayagam et al., 2021). Important groups of  
55 patients, such as those on immunosuppressive therapies, mount sub optimal responses to  
56 vaccines (Kearns et al., 2021). Therefore, effective treatments that are successful against  
57 multiple lineages of the virus are required. Targeting unique (to the virus) but conserved  
58 regions across variants, affecting functions of viral proteins such as the RNA dependent RNA  
59 polymerase (RdRp) (NSP12) is one such approach.

60 Molnupiravir is an anti-viral pro-drug originally developed against influenza virus currently  
61 undergoing clinical trials in humans for the treatment of COVID-19 (AGILE, 2021; Khoo et al.,  
62 2021). Interim phase III results suggested the drug reduced the risk of hospitalisation or death  
63 by 50% with efficacy unaffected by the timing of symptom onset, underlying risk factors, or  
64 variant type (gamma, delta, and mu) (Mahase, 2021a). As a result, the MHRA in the UK has

65 granted emergency use of the drug for treatment of mild-moderate cases of COVID-19 in  
66 patients with at least one risk factor for severe disease (Mahase, 2021b).

67 Treatment of SARS-CoV-2 infection in a ferret model of disease with molnupiravir resulted  
68 in reduced upper respiratory tract viral load and blocked transmission between animals (Cox  
69 et al., 2021). The drug was also shown to be effective against SARS-CoV-2 infection in mice  
70 (Wahl et al., 2021). A combined anti-viral effect with suboptimal doses of molnupiravir with  
71 favipiravir has also been reported in a hamster model, demonstrating a 5-log drop in viral titre  
72 and a near complete halt in transmission. However, in contrast, 24 hours post-infection the  
73 drop was 2.5 logs. Combined treatment was found to cause increased C to U changes in  
74 comparison to single treatment (Abdelnabi et al., 2021). Most of these studies have however  
75 used an early variant of the virus, a lineage A virus rather than assessed the efficacy of the  
76 drug in the more recent VOCs.

77 Molnupiravir is a pro-drug and is converted enzymatically *in-vivo* to its active form, thereby  
78 improving its absorption in the gastrointestinal tract and bioavailability. The parent drug of  
79 molnupiravir is known as NHC or  $\beta$ -D-N4-hydroxycytidine and is used for *in-vitro* studies. NHC  
80 has been tested against lineage-A SARS-CoV-2 in primary human lung epithelial cells and Calu-  
81 3 cells and found to have an IC50 of approximately 0.08 $\mu$ M in Calu-3 cells and no cytotoxicity  
82 after 48 hours (Sheahan et al., 2020). Another study using Calu-3 cells found an IC50 after 24  
83 hours of 0.4 $\mu$ M (Rosenke et al., 2021). Two independent studies have demonstrated efficacy  
84 against the Alpha and Beta variants in Vero E6 and Calu3 cells and shown to be equivalent to  
85 an ancestral strain (Lee et al., 2021; Stegmann et al., 2021). In hACE2-A549 cells, the drug has  
86 an anti-viral effect at concentrations between 0.3 to 3 $\mu$ M (Zhou et al., 2021). As yet no  
87 published *in-vitro* studies compare the drug efficacy at inhibiting viral replication to the Delta  
88 variant of SARS-CoV-2. To investigate whether NHC is effective at inhibiting variants of SARS-

89 CoV-2 with equal efficiency, a human lung epithelial cell model (hACE2-A549 cells) was  
90 infected at the same time as treatment with varying concentrations of the drug or treated at  
91 different times.

## 92 **Materials and Methods**

93

### 94 **Compound**

95 NHC (Alsachim) was supplied as a 1mg powder and was resuspended in 1ml DMSO to  
96 provide a 4.07mM stock solution. This was diluted in viral maintenance media (DMEM  
97 containing 2% FBS and 0.05mg/ml gentamicin) for experiments using a range of  
98 concentrations.

99

### 100 **Cell culture**

101 Human ACE2-A549 (hACE2-A549), a lung epithelial cell line which overexpresses the ACE-  
102 2 receptor, were the kind gift of Oliver Schwartz (Buchrieser et al., 2020). These were used  
103 to test the drug. These were cultured in DMEM with 10% FBS and 0.05mg/ml gentamicin  
104 with the addition of 10µg/ml Blastidin (Invitrogen). Only passage 3-10 cultures were  
105 used for experiments. Vero/hSLAM cells (PHE) were grown in DMEM with 10% FBS and  
106 0.05mg/ml gentamicin (Merck) with the addition of 0.4mg/ml Geneticin (G418;  
107 Thermofisher) at 37°C/5% CO<sub>2</sub>.

108

### 109 **Viral Culture**

110 Virus stocks were grown in Vero/hSLAM cells using DMEM containing 2% FBS, 0.05mg/ml  
111 gentamicin and 0.4mg/ml geneticin and harvested 72 hours post inoculation. Virus stocks  
112 were aliquoted and stored at -80°C. The titre of stocks (PFU/ml) was determined by plaque  
113 assay. RNA from viral stocks were sequenced by Oxford Nanopore long read length  
114 sequencing on flow cells run on GridION.

115

## 116        **Sequencing of viral stocks**

117        Sequencing libraries for amplicons generated by ARTIC were prepared following the ‘PCR  
118        tiling of SARS-CoV-2 virus with Native Barcoding’ protocol provided by Oxford Nanopore  
119        Technologies using LSK109 and EXP-NBD196. The artic-ncov2019 pipeline v1.2.1  
120        (<https://artic.network/ncov-2019/ncov2019-bioinformatics-sop.html>) was used to filter  
121        the passed fastq files produced by Nanopore sequencing with read lengths between 400  
122        nt and 700 nt for ARTIC amplicons. This pipeline was then used to map the filtered reads  
123        on the reference SARS-CoV-2 genome (MN908947.3) by minimap2 and assigned each read  
124        alignment to a derived amplicon and excluded primer sequences based on the ARTIC V3  
125        and V4 primer schemes in the bam files. Primer-trimmed bam files were further analysed  
126        using DiversiTools (<http://josephhughes.github.io/DiversiTools/>) with the “-orfs” function  
127        to generate the ratio of amino acid change in the reads and coverage at each site of protein  
128        in comparison to the reference SARS-CoV-2 genome (MN908947.3). The amino acids with  
129        highest ratio and coverage > 10 were used to assemble the consensus protein sequences.  
130        Pangolin (<https://pangolin.cog-uk.io/>) was used to confirm lineages of each viral stock  
131        used in experiments.

132

## 133        ***In-vitro* cytotoxicity of NHC**

134        Human ACE2-A549 cells were plated at  $2 \times 10^4$  cells per well in a clear bottomed white 96  
135        well plate. Twenty-four hours later the medium was replaced with media containing NHC  
136        at different concentrations. At 72 hours post-exposure, cell viability was measured by  
137        CellTiter-Glo assay (Promega) as per the manufacturer’s instructions.

138

139

140 **Anti-viral activity of NHC against SARS-CoV-2 Variants of Concern (VoCs)**

141 Human ACE2-A549 cells were grown to confluency and infected at an MOI of 0.1 in either  
142 DMEM with 2%FBS and 0.05mg/ml gentamicin, or in the same media containing 0.01 $\mu$ M,  
143 0.1 $\mu$ M, 1 $\mu$ M or 10 $\mu$ M NHC by allowing virus to adsorb to cells in a volume of 100 $\mu$ l for one  
144 hour at 37°C, and then topping up to 500 $\mu$ l with the relevant media afterwards. A mock  
145 infected control and a DMSO control were included in each experiment and experiments  
146 were repeated a minimum of 3 times. After 72 hours, supernatants were collected and  
147 stored at -80°C until viral titre was determined by plaque assay. The inhibitory potency of  
148 NHC measured as the absolute IC50 was defined as the concentration of drug that resulted  
149 in a 50% reduction in the number of plaques compared to untreated controls.

150

151 **Pre-exposure and Post-exposure to NHC**

152 For pre-exposure experiments, media was removed from cells and replaced with media  
153 containing NHC two hours prior to infection. This was then removed for infection, which  
154 was performed as described above. For post-exposure experiments, infections were  
155 performed in media as described above. At two, four, 24 or 48 hours post-infection, media  
156 was removed from cells. The cells were washed twice with PBS, and the media replaced  
157 with media containing 0 $\mu$ M, 0.01 $\mu$ M, 0.1 $\mu$ M, 1 $\mu$ M or 10 $\mu$ M NHC. After 72 hours post-  
158 infection, supernatants were collected and stored at -80°C until viral titre was determined  
159 by plaque assay.

160



161 **Statistical analysis**

162 A one-way ANOVA was used to evaluate the in-vitro cytotoxicity data. The absolute IC50  
163 values were calculated using GraphPad Prism 9, using a non-linear 4-parameter logistic  
164 regression in a dose-response curve.

165

166 **Results**

167 In order to find the appropriate concentration range of NHC in hACE2-A549 cells, to  
168 investigate the effect on viral biology, Cell-titer Glo Assay (Promega) were used to measure %  
169 ATP production in cells. These were treated with DMSO or different concentrations of NHC  
170 diluted in hACE2-A549 culture medium compared to mock untreated cells. DMSO, at the  
171 highest concentration used (0.25%) had no effect on cells ( $p>0.05$ ). There was a slight increase  
172 in the ATP production in cells at the lowest concentration of drug,  $0.01\mu\text{M}$  ( $p=0.02$ ). The only  
173 concentration of drug to inhibit the ATP production was  $10\mu\text{M}$  ( $p>0.0001$ ) (Figure 1).  
174 Therefore, dose response assays to the drug could be conducted with concentrations of the  
175 drug up to  $10\mu\text{M}$ .

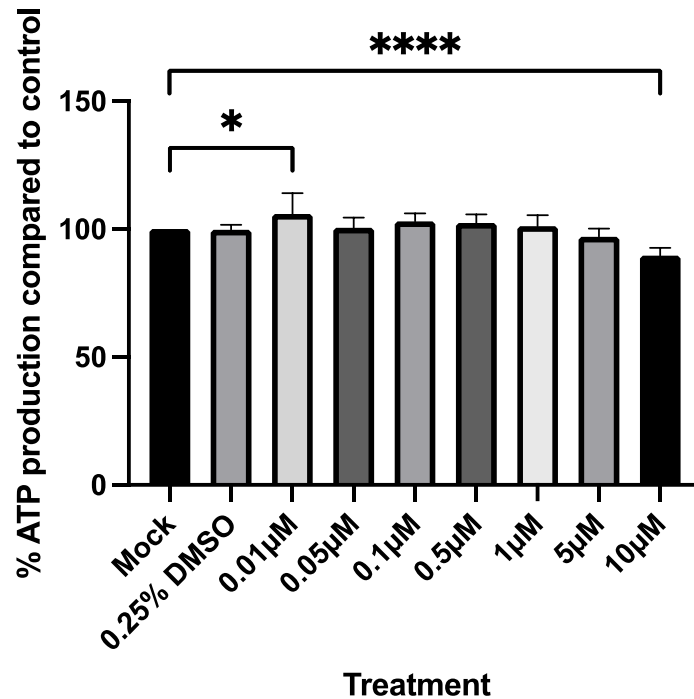

176

177 **Figure 1. In-vitro cytotoxicity of NHC to hACE2-A549 cells.** Cytotoxicity of different  
178 concentrations (in µM) was measured using the Cell-titer Glo Assay to measure the  
179 percentage ATP production in treated cells compared to mock treated cells (n=7). There was  
180 no significant difference in % ATP production of cells compared to control cells in most  
181 concentrations of NHC, except at 10µM ( $p < 0.0001$ ) and 0.1µM ( $p = 0.02$ ).

182

183 To determine the inhibitory activity of NHC against different VOCs and an ancestral B-lineage  
184 virus, dose response assays were performed by infecting hACE2-A549 cells at an MOI of 0.1  
185 in media alone and in media containing 0.01, 0.1, 1, and 10µM NHC. After 72 hours  
186 incubation, cell supernatants were removed, and viral titres determined by plaque assay. The  
187 IC50 (the concentration of drug required to inhibit virus titre by 50%) was determined using  
188 non-linear regression with GraphPad Prism 9. The results demonstrated similar IC50 values  
189 for each variant and the ancestral strain of between 0.04 and 0.16µM concentrations (Table  
190 1) (Figure2).

| Variant                              | IC50 ( $\mu\text{M}$ ) | 95% CI    |
|--------------------------------------|------------------------|-----------|
| Liverpool/REMRQ0001/2020 (B lineage) | 0.111                  | 0.04-0.54 |
| Alpha (B.1.1.7)                      | 0.104                  | 0.05-0.02 |
| Beta (B.1.351)                       | 0.134                  | 0.05-0.03 |
| Delta (B.1.617.2)                    | 0.103                  | 0.06-0.16 |

191

192 **Table 1. IC50 values of NHC against variants in a hACE2-A549 human lung cell model.**

193 Inhibitory activity of NHC against an early variant of SARS-CoV-2  
194 (Liverpool/REMRQ0001/2020) and Alpha (B.1.1.7), Beta (B.1.351) and Delta (B.1.617.2)  
195 variants of concern (VOCs). A non-linear regression was used to calculate the IC50 for each  
196 variant (n=4).

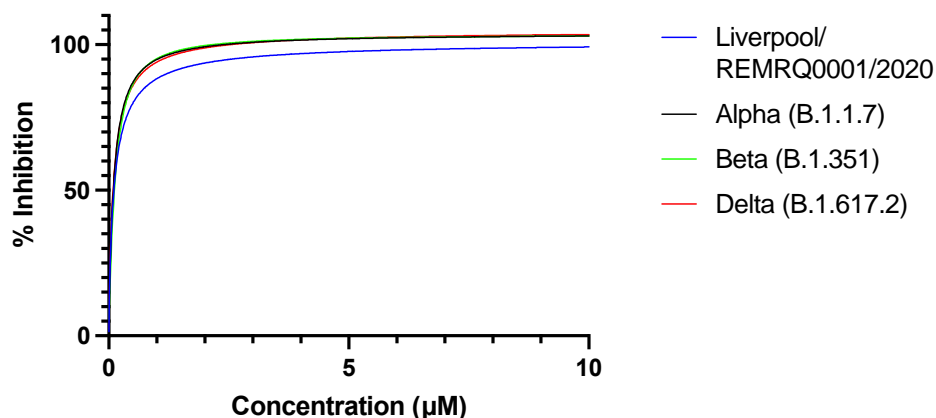

197

198 **Figure 2. NHC is similarly active against both an early variant and VOCs.** Inhibitory activity

199 of NHC against an early variant of SARS-CoV-2 (Liverpool/REMRQ0001/2020) and Alpha  
200 (B.1.1.7), Beta (B.1.351) and Delta (B.1.617.2) variants of concern (VOCs). A non-linear  
201 regression was used to plot the dose response curves and calculate the IC50 for each variant  
202 (n=4).

203

204           To determine the effective treatment window, cells were both pre-treated with  
205   different concentrations of NHC two hours prior to infection and treated at two, four, 24- and  
206   48-hours post-infection and compared to concurrent treatment/infection. Dose-response  
207   assays were performed on supernatants collected 72 hours post-infection. Viral titres  
208   remained similar if treatment was given prior to, or at the same time as infection and at time  
209   points of two, four- and 24-hours post-infection. However, if treatment was given at 48 hours  
210   post-infection, the drug was not as effective for all variants tested (Figure 3).

211

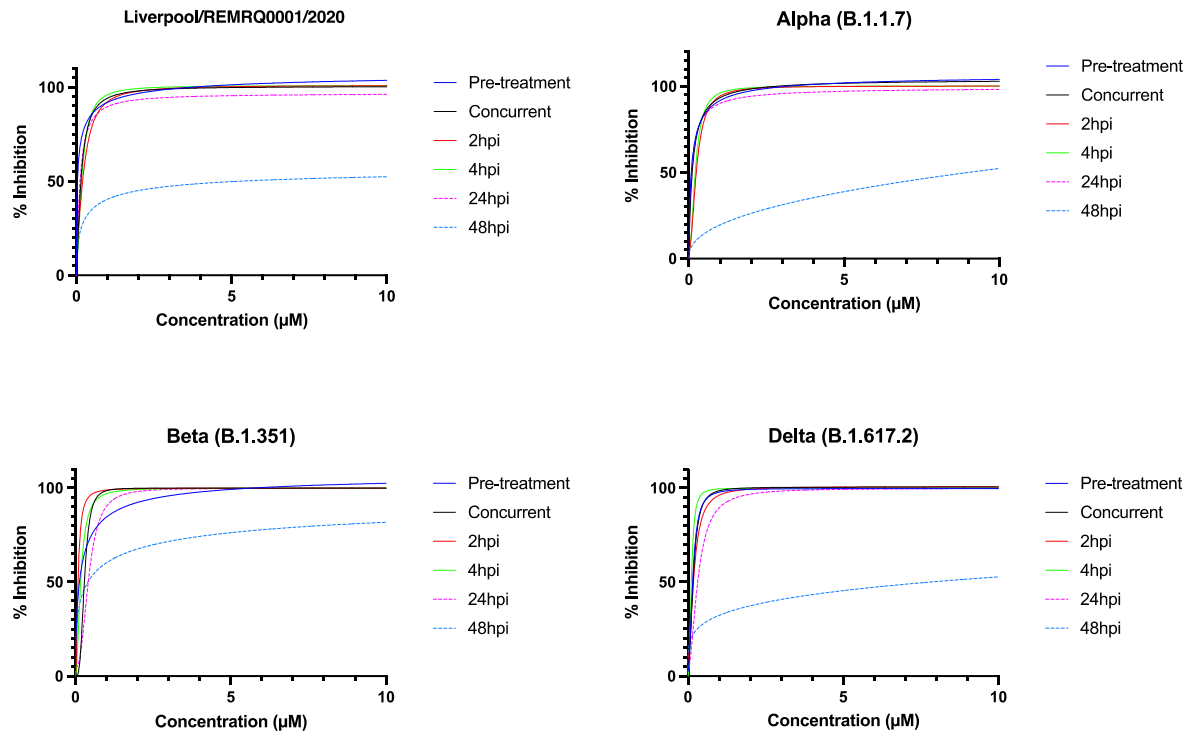

212

213 **Figure 3. Effect of pre-treatment, concurrent treatment and treatment at two, four, 24 and**

214 **48 hours post-infection on inhibition of viral growth.** Dose response assays were performed

215 on supernatants collected 72 hours post-infection. Cells were either pre-treated with drug

216 prior to infection, treated at the same time as infection, or treated at different time points

217 post-infection. Treatment with drug inhibited growth of the virus to the same extent when

218 given prior to infection, concurrently, or two, four- or 24-hours post-infection. When

219 treatment was given 48 hours post-infection however, the drug inhibited the virus to a lesser

220 extent. A non-linear regression was used to plot the dose response curves and calculate the

221 IC50 for each variant (n=3).

## 222 Discussion

223           These results support recent clinical trial data suggesting an inhibitory effect of  
224 molnupiravir on SARS-CoV-2 (Mahase, 2021a). Molnupiravir, as a nucleoside analogue, acts  
225 by mimicking naturally occurring nucleosides to create error catastrophe during virus  
226 replication in the host. Therefore, we would expect this compound to act against all variants  
227 of the virus in a similar manner. This was tested in a cell culture system against four variants  
228 of SARS-CoV-2 (a B-lineage virus compared to alpha, beta and delta variants). The data  
229 indicated a similar pattern of growth inhibition for all four variants, suggestive of a common  
230 mechanism of action. Furthermore, we have explored the therapeutic window in which the  
231 drug is most active. We show that in infected cells the drug has reduced potency if given 48  
232 hours post-infection. This data supports the results of the MOVE-In trial, where use of  
233 Molnupiravir in hospitalised patients was stopped prematurely since a statistically significant  
234 effect was deemed unlikely (Merck, 2021) and reinforces the choice to license the drug for  
235 use in mild-moderate out-patient cases.

236           However, *in-vitro* systems have several limitations in comparison to live models of  
237 infection, so results should be interpreted with care, although the mechanism of action will  
238 be intra-cellular. Use of molnupiravir in a Syrian hamster model infected with SARS-CoV-2  
239 resulted in a drop in viral load and reduced lung pathology compared to controls (Abdelnabi  
240 et al., 2021; Rosenke et al., 2021). Treatment 12 hours post-infection resulted in a protective  
241 effect (Rosenke et al., 2021) but not at 24 hours post-infection. Further work is required to  
242 delineate the true treatment window of the drug in humans with mild to moderate disease.

243           One of the main benefits of molnupiravir as opposed to remdesivir is that it can be  
244 administered orally. However, as was seen with the Influenza anti-viral, Tamiflu, resistance to  
245 anti-virals can develop rapidly (Moscona, 2005). A thorough analysis of the potential of SARS-

246 CoV-2 to develop resistance is necessary, though it is likely that any adaptation for resistance  
247 will correspond with a reduction in fitness as seen with remdesivir (Szemiel et al., 2021). Use  
248 of molnupiravir would likely be most beneficial if used in combination with another  
249 treatment, preferably targeting a different part of the viral life cycle as has been used with  
250 success for HIV treatment. Finally, molnupiravir has broad spectrum activity, shown to be  
251 effective against RSV, Influenza, and seasonal coronaviruses in *in-vitro* models. Here we have  
252 shown that the *in-vitro* activity of NHC is retained across a broad range of variants tested,  
253 suggesting that the drug can be deployed widely, and clinical effectiveness is unlikely to be  
254 adversely impacted by these different viral strains.

255

256 **Acknowledgments** Virus isolates used in this study were originally derived from samples  
257 gathered under the auspices of the ISARIC Coronavirus Clinical Characterisation Consortium  
258 (ISARIC4C) and processed at the University of Liverpool. We would like to acknowledge all  
259 members of the consortium.

260 **Funding:** This work was funded by U.S. Food and Drug Administration Medical  
261 Countermeasures Initiative contract (75F40120C00085) awarded to JAH. The article reflects  
262 the views of the authors and does not represent the views or policies of the FDA. This work  
263 was also supported by the MRC (MR/W005611/1) G2P-UK: A national virology consortium to  
264 address phenotypic consequences of SARS-CoV-2 genomic variation (co-I JAH). JAH and LT are  
265 funded by the Centre of Excellence in Infectious Diseases Research (CEIDR) and the Alder Hey  
266 Charity. LT is supported by a Wellcome Trust fellowship [205228/Z/16/Z]. LT, TF and JAH are  
267 also supported by the National Institute for Health Research Health Protection Research Unit  
268 (HPRU) in Emerging and Zoonotic Infections (NIHR200907) at University of Liverpool in  
269 partnership with Public Health England (PHE), in collaboration with Liverpool School of  
270 Tropical Medicine and the University of Oxford. The views expressed are those of the  
271 author(s) and not necessarily those of the NHS, the NIHR, the Department of Health or Public  
272 Health England. For the purpose of Open Access, the authors have applied a CC BY public  
273 copyright license to any Author Accepted Manuscript version arising from this submission.

274 **Author contributions.** Conceptualization: TP, TF, SK and JAH. Methodology: TP, ID-B, HG and  
275 RP-R. Validation: TP. Formal analysis: TP, ID-B, HG, RP-R and JAH. Investigation: TP. Resources:  
276 LT, SK and JAH. Data Curation: TP, ID-B, HG and RP-R. Writing – original draft: TP and JAH.  
277 Writing – Review and Editing: All authors. Visualisation: TP. Supervision: TF, SK and JAH.  
278 Project administration: JAH. Funding acquisition: TF, SK, LT and JAH.



279 **References**

280

281 Abdelnabi, R., Foo, C.S., Kaptein, S.J.F., Zhang, X., Do, T.N.D., Langendries, L., Vangeel, L.,  
282 Breuer, J., Pang, J., Williams, R., Vergote, V., Heylen, E., Leyssen, P., Dallmeier, K., Coelmont,  
283 L., Chatterjee, A.K., Mols, R., Augustijns, P., De Jonghe, S., Jochmans, D., Weynand, B., Neyts,  
284 J., 2021. The combined treatment of Molnupiravir and Favipiravir results in a potentiation of  
285 antiviral efficacy in a SARS-CoV-2 hamster infection model. *EBioMedicine* 72, 103595.

286 AGILE, 2021. AGILE (Early Phase Platform Trial for COVID-19).

287 Cox, R.M., Wolf, J.D., Plemper, R.K., 2021. Therapeutically administered ribonucleoside  
288 analogue MK-4482/EIDD-2801 blocks SARS-CoV-2 transmission in ferrets. *Nat Microbiol* 6, 11-  
289 18.

290 Khoo, S.H., Fitzgerald, R., Fletcher, T., Ewings, S., Jaki, T., Lyon, R., Downs, N., Walker, L.,  
291 Tansley-Hancock, O., Greenhalf, W., Woods, C., Reynolds, H., Marwood, E., Mozgunov, P.,  
292 Adams, E., Bullock, K., Holman, W., Bula, M.D., Gibney, J.L., Saunders, G., Corkhill, A., Hale, C.,  
293 Thorne, K., Chiong, J., Condie, S., Pertinez, H., Painter, W., Wrixon, E., Johnson, L., Yeats, S.,  
294 Mallard, K., Radford, M., Fines, K., Shaw, V., Owen, A., Lalloo, D.G., Jacobs, M., Griffiths, G.,  
295 2021. Optimal dose and safety of molnupiravir in patients with early SARS-CoV-2: a Phase I,  
296 open-label, dose-escalating, randomized controlled study. *Journal of Antimicrobial*  
297 *Chemotherapy* 76, 3286-3295.

298 Mahase, E., 2021a. Covid-19: Molnupiravir reduces risk of hospital admission or death by 50%  
299 in patients at risk, MSD reports. *BMJ* 375, n2422.

300 Mahase, E., 2021b. Covid-19: UK becomes first country to authorise antiviral molnupiravir.  
301 BMJ 375, n2697.

302 Merck, 2021. Merck and Ridgeback Biotherapeutics provide update on progress of clinical  
303 development program for molnupiravir, an investigational oral therapeutic for the treatment  
304 of mild-to-moderate covid-19.

305 Ritchie, H., Mathieu, E., Rodés-Guirao, L., Appel, C., Giattino, C., Ortiz-Ospina, Joe Hasell, E.,  
306 Macdonald, B., Beltekian, D., Roser, M., 2021. Coronavirus Pandemic (COVID-19), Our World  
307 in Data.

308 Rosenke, K., Hansen, F., Schwarz, B., Feldmann, F., Haddock, E., Rosenke, R., Barbian, K.,  
309 Meade-White, K., Okumura, A., Leventhal, S., Hawman, D.W., Ricotta, E., Bosio, C.M.,  
310 Martens, C., Saturday, G., Feldmann, H., Jarvis, M.A., 2021. Orally delivered MK-4482 inhibits  
311 SARS-CoV-2 replication in the Syrian hamster model. Nature Communications 12, 2295.

312 Singanayagam, A., Hakki, S., Dunning, J., Madon, K.J., Crone, M.A., Koycheva, A., Derqui-  
313 Fernandez, N., Barnett, J.L., Whitfield, M.G., Varro, R., Charlett, A., Kundu, R., Fenn, J., Cutajar,  
314 J., Quinn, V., Conibear, E., Barclay, W., Freemont, P.S., Taylor, G.P., Ahmad, S., Zambon, M.,  
315 Ferguson, N.M., Lalvani, A., Badhan, A., Dustan, S., Tejpal, C., Ketkar, A.V., Narean, J.S.,  
316 Hammett, S., McDermott, E., Pillay, T., Houston, H., Luca, C., Samuel, J., Bremang, S., Evetts,  
317 S., Poh, J., Anderson, C., Jackson, D., Miah, S., Ellis, J., Lackenby, A., 2021. Community  
318 transmission and viral load kinetics of the SARS-CoV-2 delta (B.1.617.2) variant in vaccinated  
319 and unvaccinated individuals in the UK: a prospective, longitudinal, cohort study. The Lancet  
320 Infectious Diseases.

321 Wahl, A., Gralinski, L.E., Johnson, C.E., Yao, W., Kovarova, M., Dinnon, K.H., 3rd, Liu, H.,  
322 Madden, V.J., Krzystek, H.M., De, C., White, K.K., Gully, K., Schäfer, A., Zaman, T., Leist, S.R.,  
323 Grant, P.O., Bluemling, G.R., Kolykhalov, A.A., Natchus, M.G., Askin, F.B., Painter, G., Browne,  
324 E.P., Jones, C.D., Pickles, R.J., Baric, R.S., Garcia, J.V., 2021. SARS-CoV-2 infection is effectively  
325 treated and prevented by EIDD-2801. *Nature* 591, 451-457.

326
